# Supplementary material for: A Modified Gaussian Plume Model for Mobile in situ Greenhouse Gas Measurements
Source: Copernicus journal article supplement (doi:10.5194/amt-2023-193), 2023-09-20
Supplement: Supplementary file 1 [file amt-2023-193-supplement.pdf]

## S1. Developing the asymmetric correction function

From the controlled release experiment, we noticed the severity of the asymmetric smoothing to the observed plumes caused by the LGR UGGA's lower flow rate and high mean residence time. The function we used to model the instrument response is an asymmetric function which is similar to a log-normal distribution. This function was chosen because the characteristic variables,  $\sigma$  and  $\mu$ , move the function's vertical and horizontal components of the local maxima independently. We then determined a linear speed dependence for the hand fitted  $\mu$  parameters which best matched observed concentration-distance plumes from the controlled release experiment with a simple linear regressions. Then, we determined a linear relation between the fitted  $\sigma$  and  $\mu$  values. These speed dependent smoothing factors were then extrapolated to zero velocity, and then these parameter values ( $\sigma = 0.517$ ,  $\mu = 2.57$ ) were taken to the time ordinate parameters, or smoothing coefficients concentration-time inversion tests. Middling values between the fitted parameters, ( $\sigma = 0.65$ ,  $\mu = 2.2$ ) were used for the concentration-distance plumes. Both are shown in Figure S1. We normalize the function across a specified window length, which when convolved with an enhancement plume shape, results in an asymmetrically skewed curve with the same enhancement area as the original curve.

### S1.1 Asymmetric smoothing and comparing quasi-coincidental plume transects.

During another mobile field campaign measuring plumes at the Petrolia landfill near Petrolia, Ontario, the LGR UGGA instrument was deployed in a rented vehicle as a mobile GHG laboratory. The same Airmar WX220 was used as a GPS receiver in this setup. To compare quasi-coincidental observations, the UGGA equipped vehicle drove ~30m behind the ECCC Picarro vehicle through the same methane plume from transects recorded at 17:11 UTC on 2021-09-19<sup>1</sup>. We determined a temporal offset to align centre of each peak, and then convolved a the Picarro plume, interpolated to 1 second intervals, with the smoothing windows, and the results are shown in Figure S1. The  $r^2$  coefficient for the observations increases from 0.29 for the Picarro observations and the UGGA, to 0.9 for the smoothed plume. This represents a significant improvement in the comparability of quasi-coincidental observations.

## S2. Mobile Measurement Platforms

The bicycle based mobile laboratory consists of a Los Gatos Research (Mountain View, California, USA) Ultraportable Greenhouse Gas Analyzer (LGR UGGA), and an Airmar WX220 weather station. The inlet line was mounted at approximately 1.6m above ground, with the weather station slightly above, at a height of 1.8m. The LGR UGGA uses integrated cavity output spectroscopy to measure dry air mole fractions of methane, carbon dioxide, carbon monoxide and water vapour. The instrument has a stated precision of 3ppb, 0.4ppm, and 60ppm over a one second period for methane, carbon dioxide, and water vapour, respectively. Because of favourable riding conditions, a significant fraction of the data collected with this setup are in the summer months, from May until September of each year.

---

1 The data from that day's surveys can be viewed at:  
<https://www.atmos.physics.utoronto.ca/GTA-Emissions/StaticMaps/2021-09-19/>.

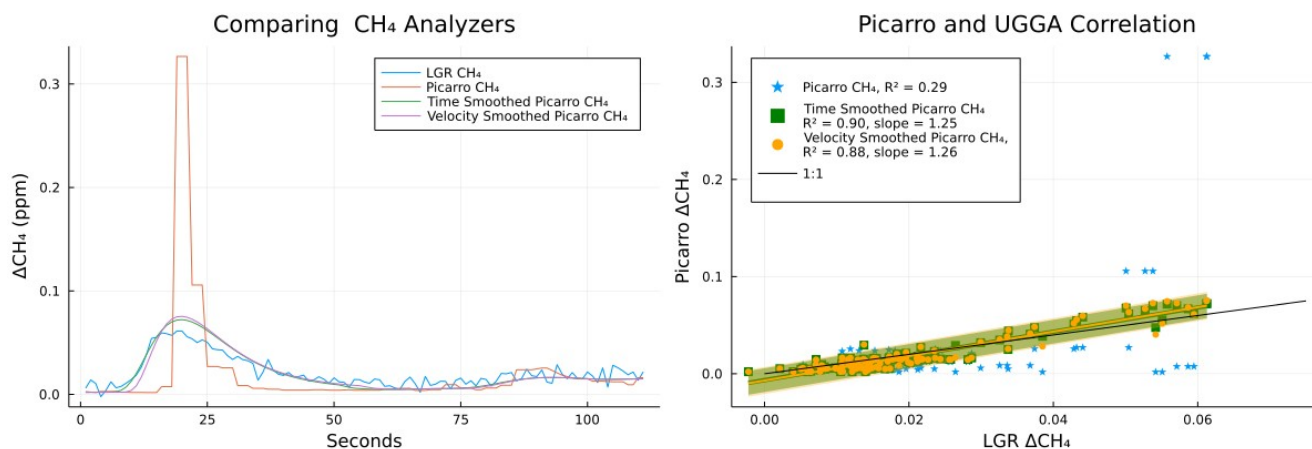

Figure S1: Left: Observed methane enhancement vs. time for quasi-coincident Picarro and UGGA mobile observations. Right: the Picarro enhancement vs the UGGA enhancement. The unaltered Picarro plume is shown with blue stars, and the smoothed Picarro plumes are shown in green squares, and yellow circles for the time and velocity smoothing parameters respectively.

For the data considered in this study, Environment and Climate Change Canada’s vehicle based laboratory has used both G1301 and G2401 cavity ring down spectrometers developed by Picarro (Santa Clara, California, USA) to measure mole fractions of methane, carbon dioxide, and water vapour. The G1301 analyzer had a precision of 1ppb, 0.2ppm, and 100ppm for CH<sub>4</sub>, CO<sub>2</sub>, and H<sub>2</sub>O, over a 5 second integration period, respectively. The G2401 analyzer has a precision of <1ppb, <0.05ppm, and <30ppm for the same gasses over a 5s integration period. The inlet for the vehicle laboratory is roughly 2.5m above the ground.

### S3. The Controlled Release Experiment

#### S3.1. Inversion Results by different stability class.

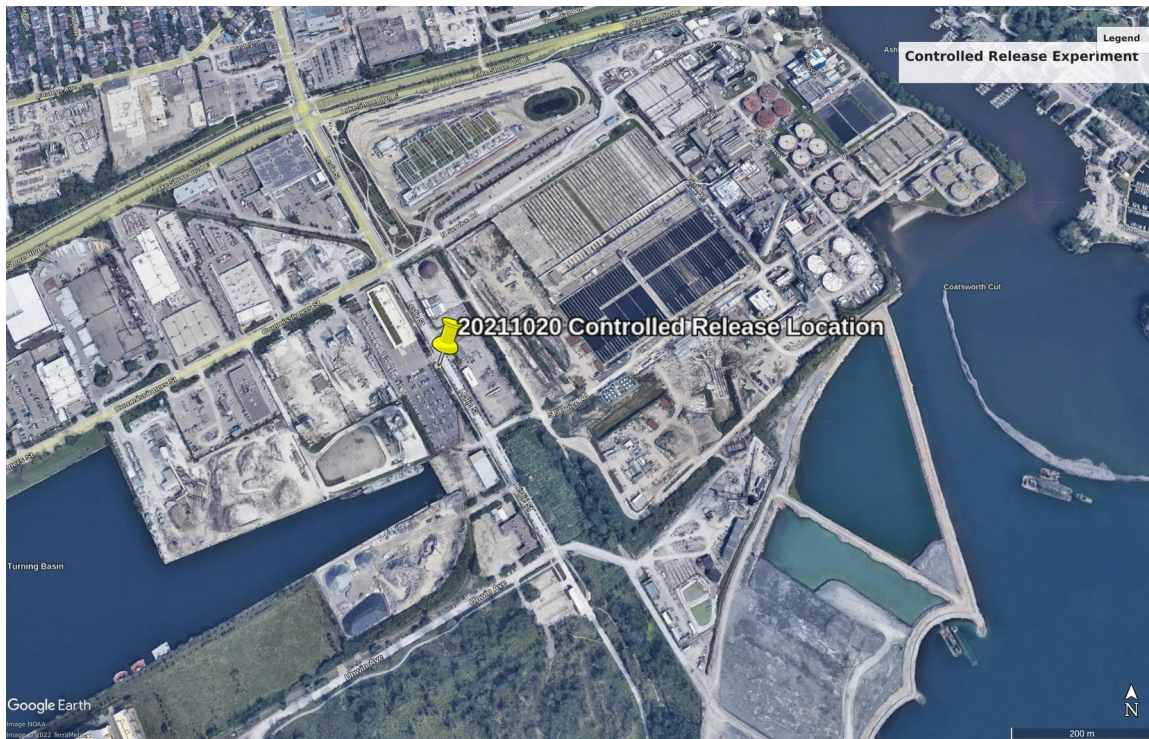

Figure S2: The location of the gas outlet from our controlled release experiment on 2021-10-20. Transects were driven on the road and bicycle path along Leslie street, directly downwind of the release location.

Table S1: Line of best fit parameters for the controlled release experiment Gaussian area inversions, with results plotted in Figure S3.

| Inversion        | Bike Unfiltered Slope | Bike Unfiltered Intercept | Bike Filtered Slope | Bike Filtered Intercept | Car Slope       | Car Intercept | Combined Slope  | Combined Intercept |
|------------------|-----------------------|---------------------------|---------------------|-------------------------|-----------------|---------------|-----------------|--------------------|
| Urban A/B        | $1.55 \pm 0.66$       | $7.3 \pm 7.2$             | $1.96 \pm 0.80$     | $0.3 \pm 9.5$           | $1.50 \pm 0.71$ | $1.3 \pm 2.9$ | $1.71 \pm 0.34$ | $0.8 \pm 3.8$      |
| Urban C          | $1.01 \pm 1.00$       | $14.8 \pm 11.1$           | $1.66 \pm 0.67$     | $0.4 \pm 7.9$           | $1.18 \pm 0.24$ | $1.9 \pm 2.5$ | $1.39 \pm 0.29$ | $1.2 \pm 3.2$      |
| Rural A          | $1.01 \pm 1.01$       | $14.8 \pm 11.1$           | $1.66 \pm 0.67$     | $0.4 \pm 7.9$           | $1.18 \pm 0.24$ | $1.9 \pm 2.5$ | $1.39 \pm 0.29$ | $1.2 \pm 3.2$      |
| Rural B          | $1.25 \pm 1.78$       | $13.2 \pm 19.6$           | $1.19 \pm 0.46$     | $0.3 \pm 5.5$           | $0.83 \pm 0.21$ | $2.6 \pm 2.2$ | $0.98 \pm 0.21$ | $1.73 \pm 2.4$     |
| Rural C          | $1.91 \pm 0.54$       | $-2.9 \pm 6.0$            | $1.14 \pm 0.41$     | $0.4 \pm 5.0$           | $0.75 \pm 0.33$ | $4.2 \pm 3.5$ | $0.90 \pm 0.25$ | $2.8 \pm 2.8$      |
| $\sigma_a$ Rural | $0.87 \pm 0.98$       | $12.4 \pm 10.8$           | $1.18 \pm 0.46$     | $0.71 \pm 5.5$          | $0.83 \pm 0.21$ | $2.3 \pm 2.3$ | $0.98 \pm 0.22$ | $1.64 \pm 2.4$     |
| $\sigma_a$ Urban | $1.50 \pm 0.66$       | $7.7 \pm 7.2$             | $1.94 \pm 0.80$     | $0.0 \pm 9.5$           | $1.20 \pm 0.25$ | $1.9 \pm 2.7$ | $1.52 \pm 0.34$ | $1.02 \pm 3.84$    |

The lines of best fit for the controlled release experiment inversions were calculated using the Julia language’s LsqFit package. Based on the experimental conditions, in an unobstructed environment with low wind speeds and moderate insolation, the prescribed PSG stability class we used was Rural B. Further discussion of atmospheric stability classes is presented in SI section 6.

Plots of the estimated release rates for our recommended inversion strategies (smoothed plume area for the UGGA, and Gaussian plume area for the Picarro), for each stability class are shown in Figure S3,

and parameters for the lines of best fit are presented in Table S1. Similar results for the enhancement height inversions are presented in Figure S4 and Table S2.

Table S2: Line of best fit parameters for the controlled release experiment Gaussian enhancement height inversions, with results plotted in Figure S4.

| Inversion        | Bike Gaussian Slope | Bike Gaussian Intercept | Bike Smoothed Slope | Bike Smoothed Intercept | Car Slope       | Car Intercept  |
|------------------|---------------------|-------------------------|---------------------|-------------------------|-----------------|----------------|
| Urban A/B        | $0.41 \pm 0.16$     | $0.1 \pm 1.9$           | $2.03 \pm 0.79$     | $0.5 \pm 9.4$           | $1.43 \pm 0.31$ | $0.3 \pm 3.3$  |
| Urban C          | $0.24 \pm 0.09$     | $0.1 \pm 1.1$           | $1.70 \pm 0.65$     | $0.4 \pm 7.7$           | $1.20 \pm 0.24$ | $-0.1 \pm 2.7$ |
| Rural A          | $0.24 \pm 0.09$     | $0.1 \pm 1.0$           | $1.70 \pm 0.65$     | $0.4 \pm 7.7$           | $1.20 \pm 0.24$ | $-0.1 \pm 2.7$ |
| Rural B          | $0.13 \pm 0.04$     | $0.1 \pm 0.6$           | $1.22 \pm 0.44$     | $0.3 \pm 5.2$           | $0.93 \pm 0.23$ | $0.1 \pm 2.5$  |
| Rural C          | $0.09 \pm 0.03$     | $0.1 \pm 0.4$           | $1.16 \pm 0.40$     | $0.4 \pm 4.6$           | $0.43 \pm 0.27$ | $4.7 \pm 2.9$  |
| $\sigma_a$ Rural | $0.12 \pm 0.05$     | $0.2 \pm 0.6$           | $1.20 \pm 0.44$     | $0.7 \pm 5.2$           | $0.65 \pm 0.16$ | $1.6 \pm 1.8$  |
| $\sigma_a$ Urban | $0.41 \pm 0.16$     | $-0.1 \pm 1.9$          | $2.01 \pm 0.79$     | $0.1 \pm 9.4$           | $1.42 \pm 0.29$ | $-0.5 \pm 3.1$ |

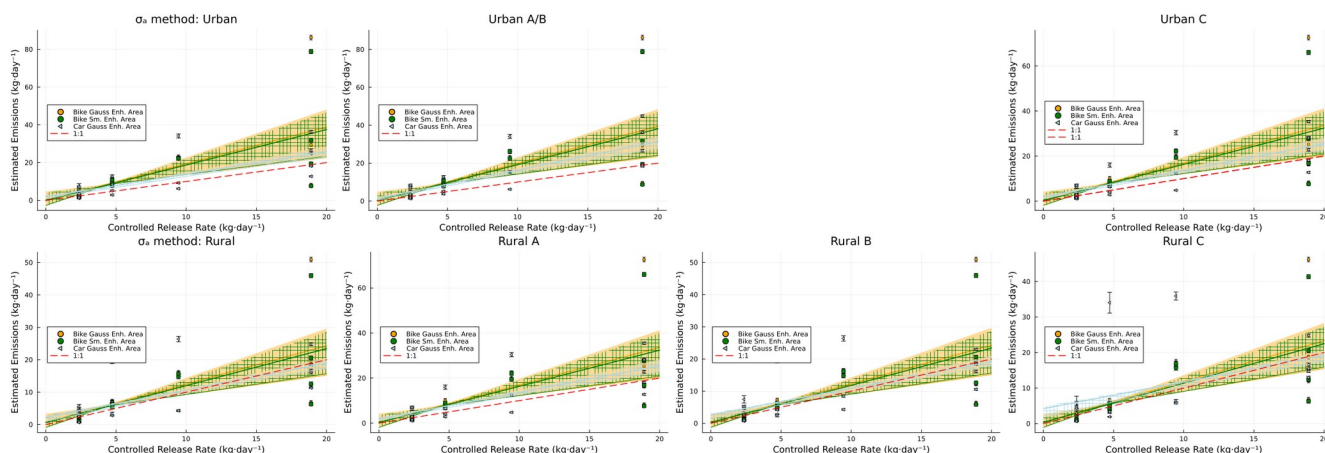

Figure S3: Controlled release experiment emissions estimates from the mobile labs using different stability classes. Smoothed area estimates shown in green with a vertical hatched ribbon, and the Gaussian area estimates for the bike are in orange with a solid ribbon, and the vehicle Gaussian area estimates are shown in light blue with a diagonal hatched ribbon.

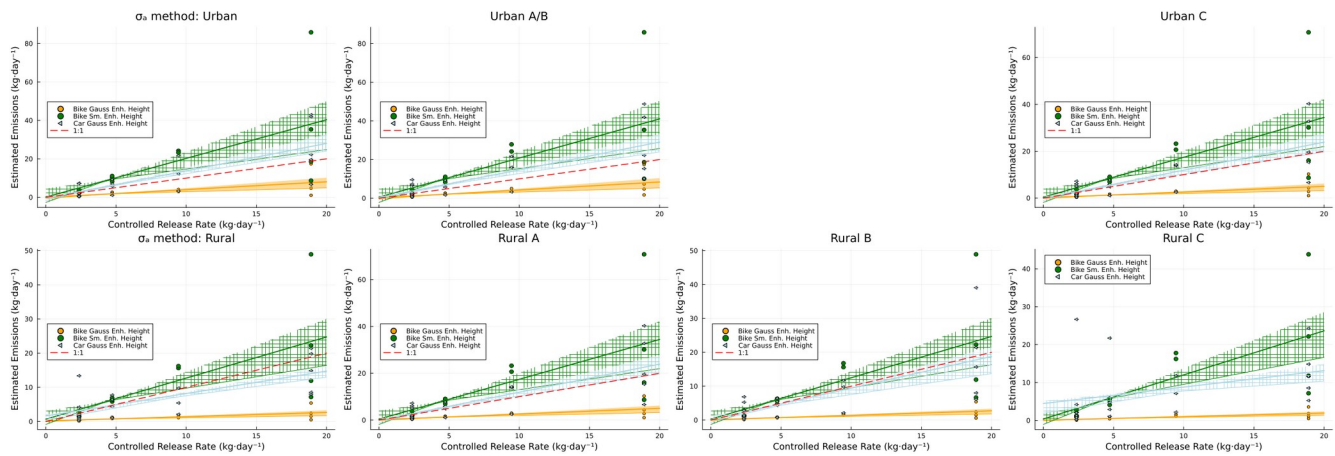

Figure S4: Controlled release experiment emissions estimates from the bike UGGA lab using different stability classes. Smoothed height estimates shown in green with a vertical hatched ribbon, and the Gaussian height estimates for the bike are in orange with a solid ribbon, and the vehicle Gaussian height are estimates are shown in light blue with a diagonal hatched ribbon.

### S3.2 Controlled release analysis using the Weller 2019 algorithm

In addition to our Gaussian plume inversion methodology, we also evaluate the log-log statistical equation presented in Weller et al. 2019. This algorithm was originally designed to roughly estimate emissions rates from urban natural gas leaks for mobile surveys (which did not collect coincidental meteorological data), utilizing the Picarro G2301 GHG analyzers. This algorithm does not consider source location, atmospheric stability, or wind speed. Our controlled release experiment was designed to test the applicability of the Gaussian plume inversion technique for nearby sources, and was of a smaller scope than those used to calibrate the Weller algorithm. The estimates from the Weller et al. 2019 algorithm when applied to our controlled release data are presented in Figure S5.

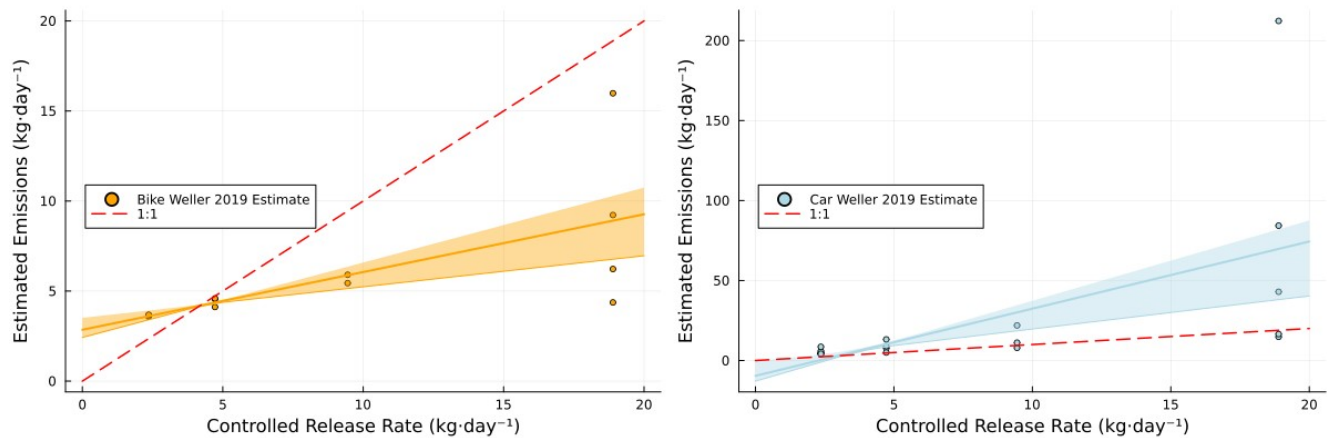

Figure S5: Methane emission estimates vs. known release rate calculated using the Weller 2019 statistical algorithm. Results from the bicycle UGGA laboratory are shown on the right, and the Picarro equipped vehicle on the left.

### S3.3 Observed Winds During the Controlled Release Experiment

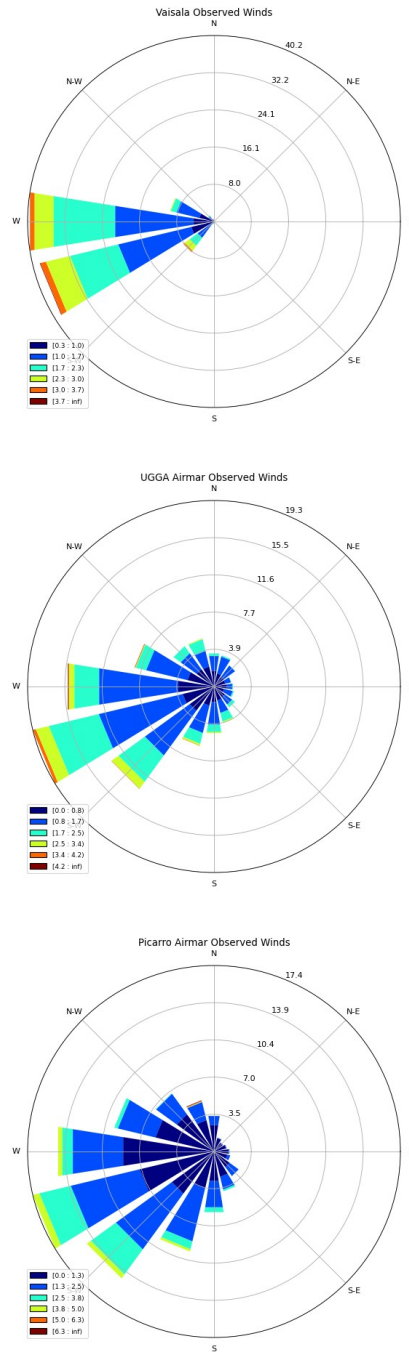

Figure S6: Wind roses for the stationary Vaisala (top), and mobile Airmar weather sensors on the bicycle UGGA lab (middle) and ECCC Picarro vehicle (bottom).

### S3.4 Filtering Inversions by Minimum Transect Distance

During our controlled release experiment on 2021-10-20, the minimum downwind transect distances recorded by each platform are shown in Figure S7. Transects completed by bicycle were constrained to the inner shoulder of the road, the adjacent sidewalk, and bicycle paths. After we noticed a high bias in the estimates from the nearest bicycle transects, we filtered out all of the bicycle transects which were less than 6.2m from the source.

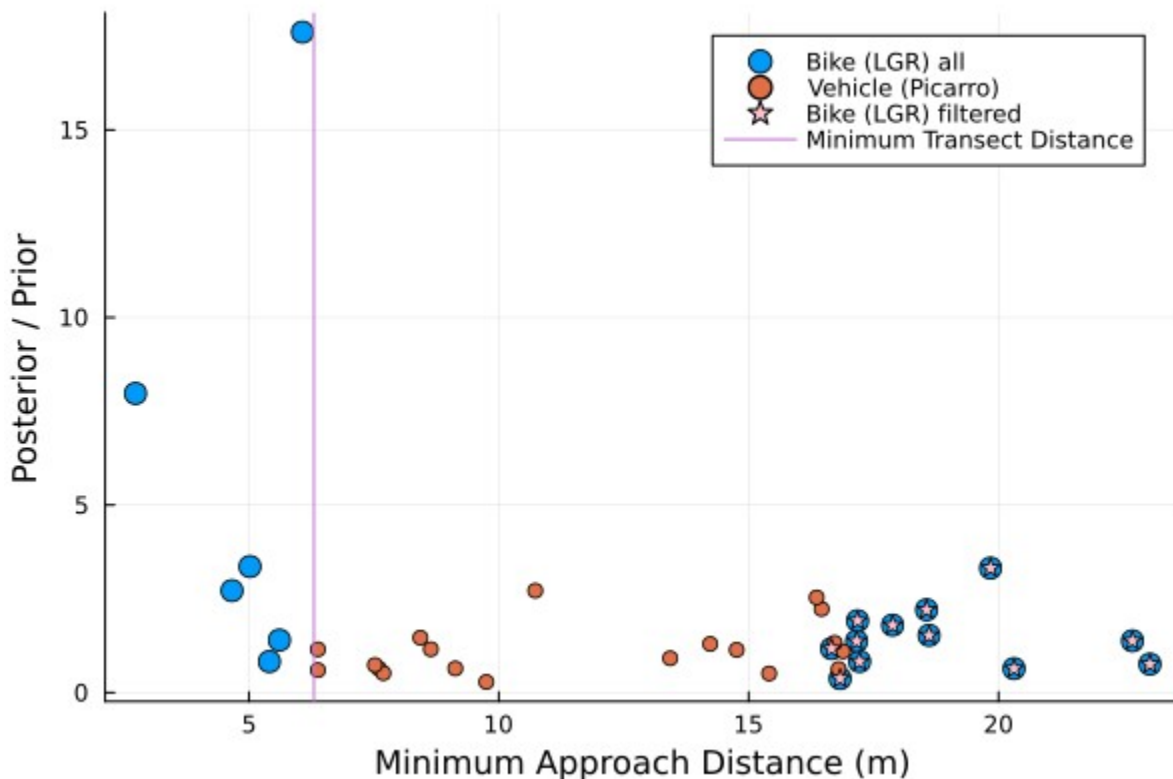

Figure S7: Ratio of estimated and controlled release rate versus transect minimum approach distance.

### S3.5 Inversion sensitivity to other model parameters

The emissions estimated from Gaussian plume inversions are dependent on initial model parameters, such as the wind speed, direction, location of the source and observations. We assume that the source location and GPS measurement coordinates are accurate.

In order to investigate our primary inversion strategy's sensitivity to the wind speed and direction, we performed a perturbation analysis. For wind direction, we recalculated the distance-concentration area inversions by rotating the wind 0.5 standard deviations of the measured wind vectors from the transect duration. Overall, these had little impact on the estimated emissions rates. For the wind speeds tests, we multiplied measured wind speeds by 2/3 and 4/3, to demonstrate the linear dependence of our inversion scheme to wind speed.



### S3.5.1 Wind Direction

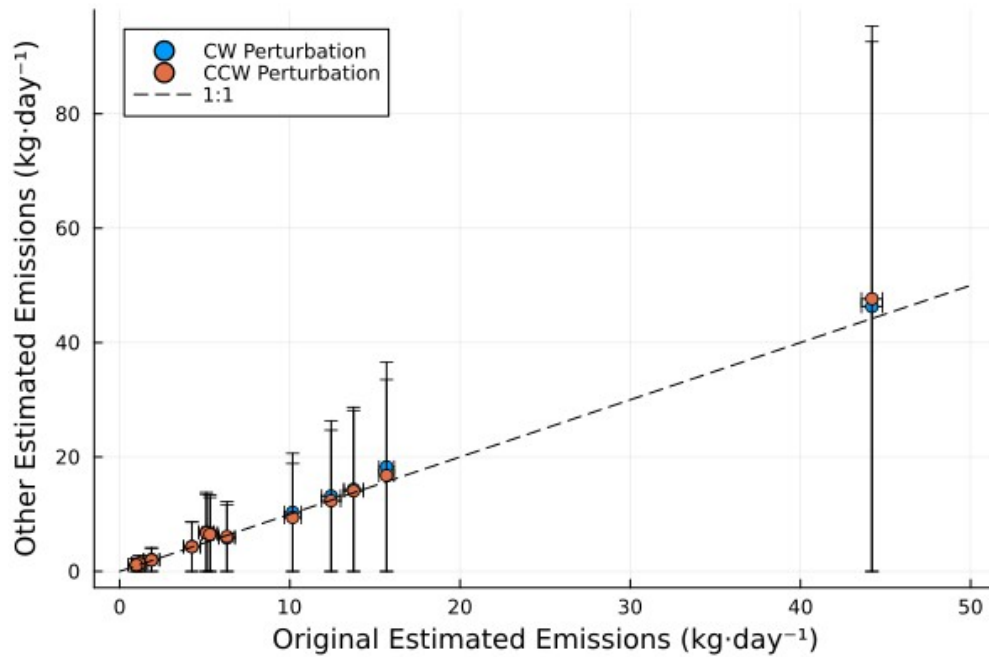

Figure S8: 2021-10-20 bike controlled release results using stability Urban C with  $\pm 0.5$  standard deviations of measured wind direction. CW data are inversion results with the wind vector rotated in a clockwise directions, while CCW indicates a counterclockwise perturbation.

### S3.5.2 Wind Speed

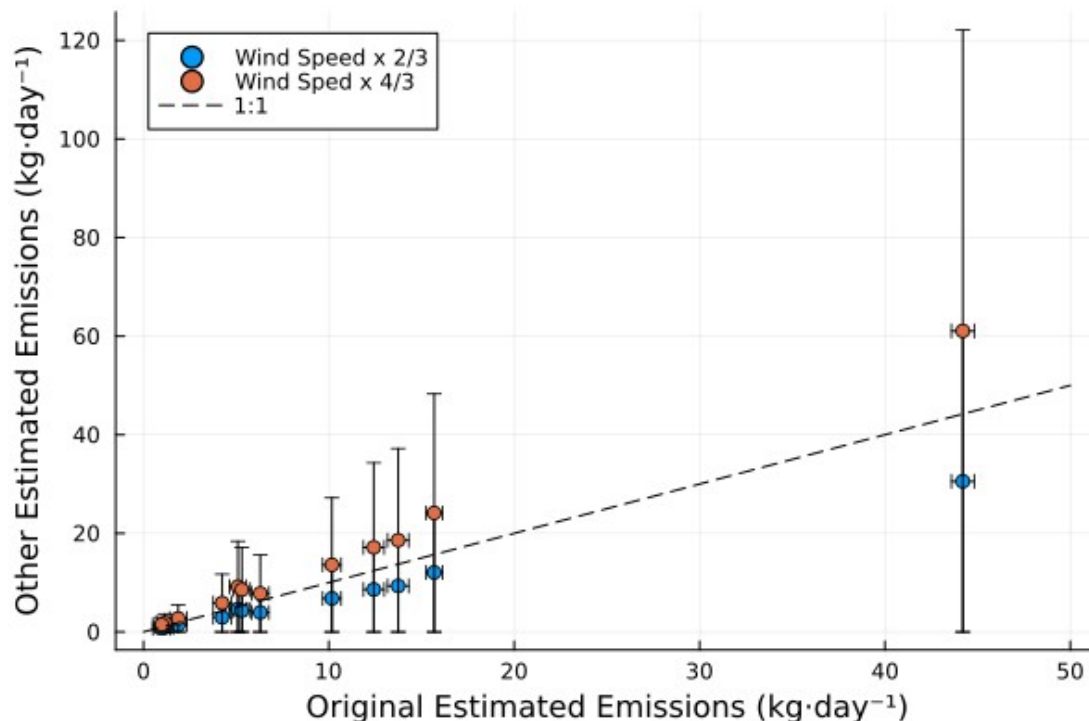

Figure S9: 2021-10-20 bike controlled release results with stability Urban C, reevaluated using 2/3 and 4/3 of measured wind speed.

## S4. Ashbridge's Bay Inversions

### S4.1 The FLAME-GTA inventory estimate

The formula from the FLAME-GTA inventory, for facilities with gas capture and destruction, is as follows,

$$F_{CH_4} = V_{gas} \times f_{CH_4} \times \rho_{CH_4} \times (1/C_{eff} - D_{eff}) \quad ,$$

where  $F_{CH_4}$  is the methane emission in metric tons of methane per year,  $V_{gas}$  is the volume of biogas produced,  $f_{CH_4}$  is the fraction of methane in the biogas by volume,  $\rho_{CH_4}$  is the density of methane gas at standard atmospheric conditions ( $0.000674 \text{ t/m}^3$ ),  $C_{eff}$  is the biogas collection efficiency (assumed 0.98 for enclosed vessels), and  $D_{eff}$  is the biogas destruction efficiency (between 0.95 and 0.98 depending on the destruction device).

### S4.2 Inversion Results by Temporal Period

In the following subsections, we present our estimates of ABWWTP emissions by year, for the four years considered in this work.

S4.2.1 Inversion Results by Year

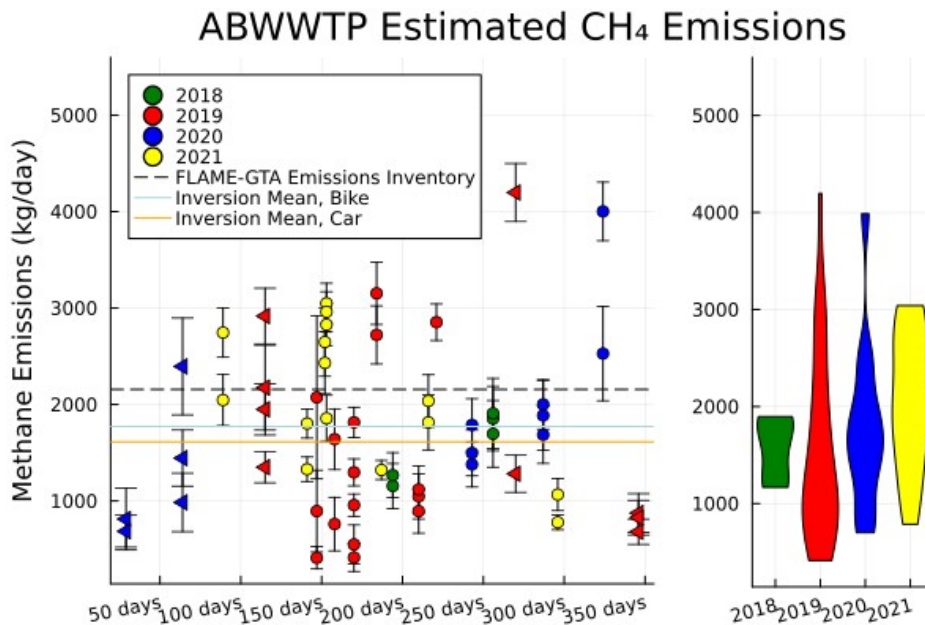

Figure S10: Left: Inversion results for all transects of ABWWTP. Bike data are shown with circle markers, and car data are triangles. Right: Violin plots showing the relative distribution frequency of different estimated emissions rates from each year's observations.

S.4.2.2 Inversion Results by Month

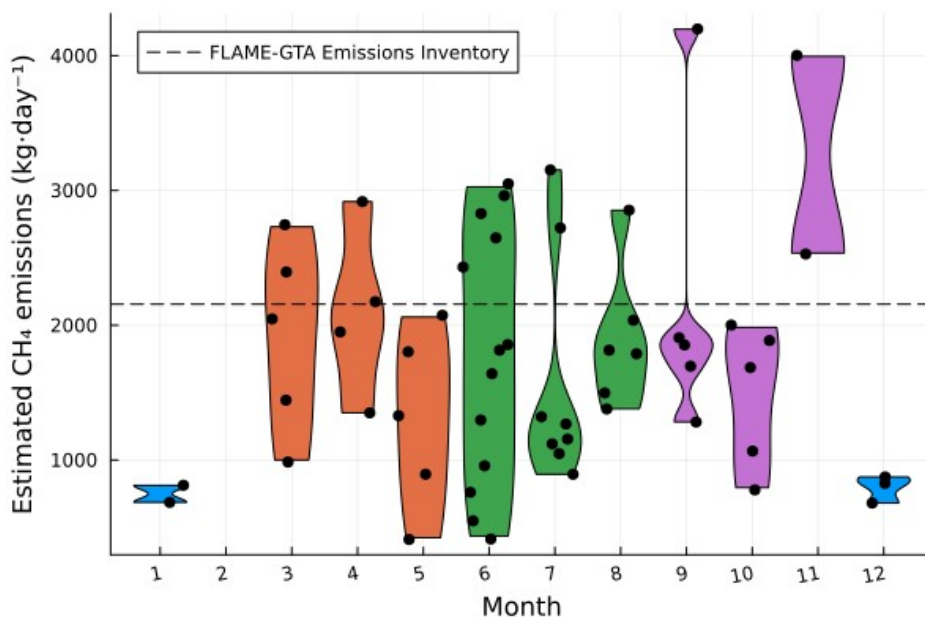

Figure S11: Violin and dot plots showing the relative distribution frequency of different estimated emissions rates from each month's observations at ABWWTP. The horizontal position of the dots within the violin plots is random.

### S4.3 Results using Various Model Parameters Perturbations.

The Gaussian plume inversion strategy is dependent on model parameters, such as stability class and wind speed and direction. In this subsection, we present how our ensemble of inversions would change if initial model parameters were changed. We show the impact of stability class choice, wind direction, and wind speed perturbations. For the wind direction perturbation test, we reprocess inversions with by adding or subtracting 0.5 times the standard deviation of the measured wind direction. For the wind speed perturbations, we reprocess inversions using 0.7 and 1.3 times the measured average windspeeds.

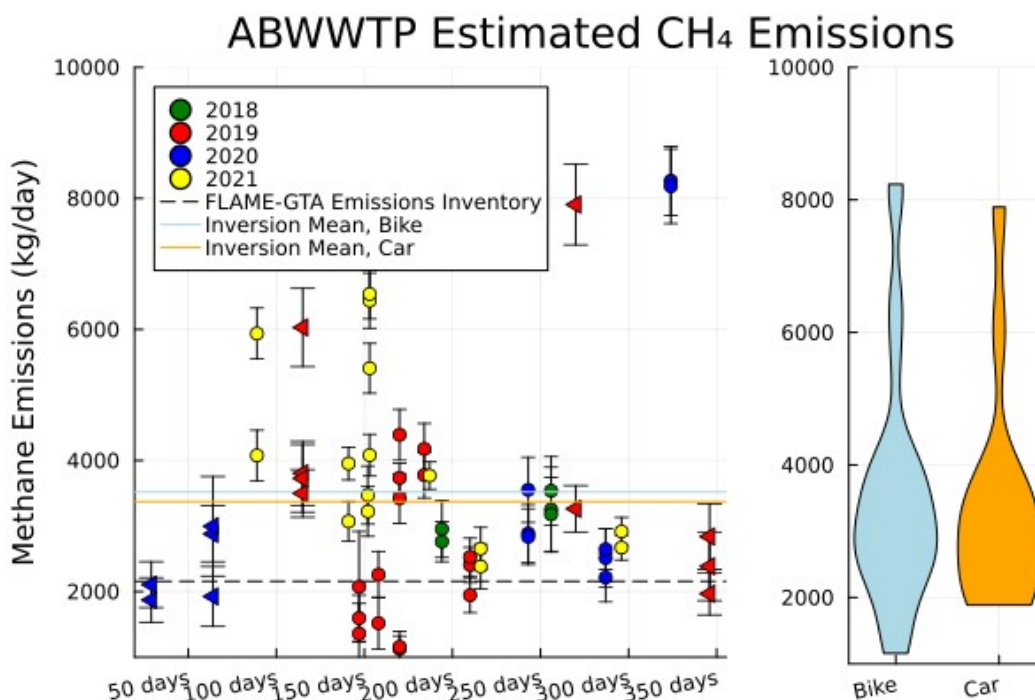

Figure S12: Left: Inversion results for all transects of ABWWTP using the Brigg's urban stability classes instead of the rural stability classes. Bike data are shown with circle markers, and car data are triangles. Right: Violin plots showing the relative distribution frequency of different estimated emissions rates from each platform's observations.

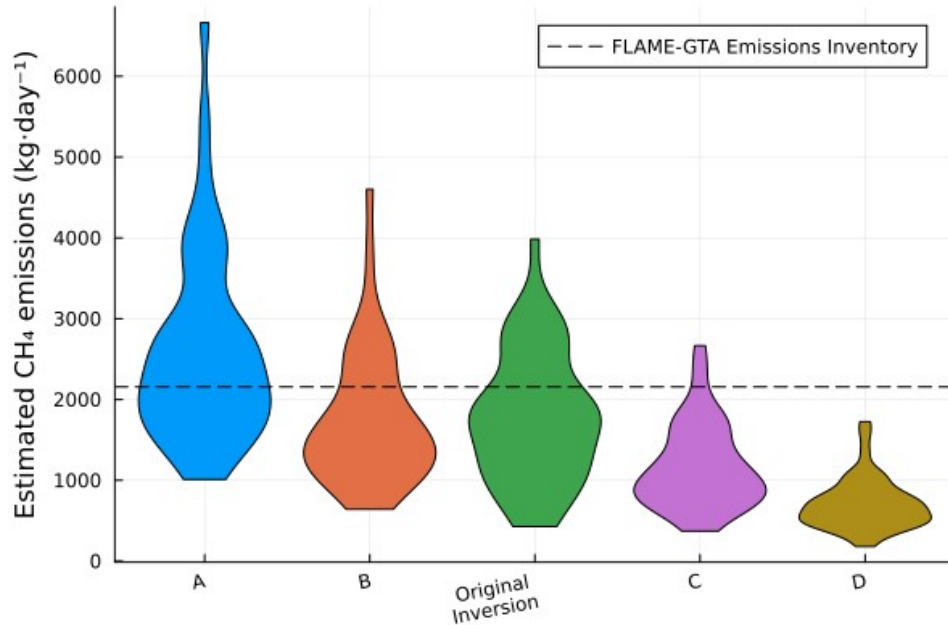

Figure S13: Violin plots showing the relative distribution frequency of emissions rates using specific rural stability classes for our ABWWTP inversions. The violin plot of the original inversions is shown in the centre in green.

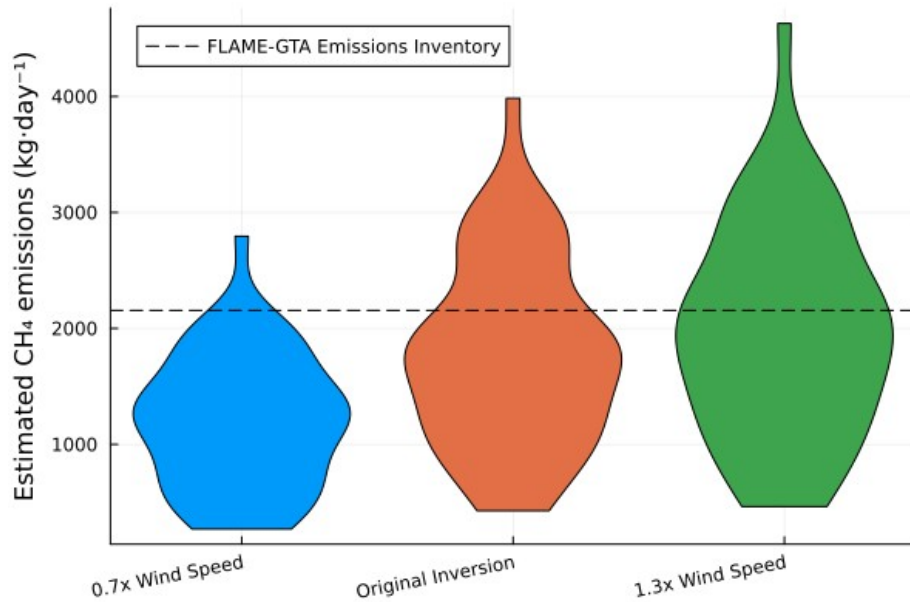

Figure S14: Violin plots showing the relative distribution frequency of emissions rates estimated from inversions with a multiplicative perturbation to the measured average windspeed as measured by the Airmar WX220s for our ABWWTP inversions. The violin plot of the original inversions is shown in the centre in dark orange.

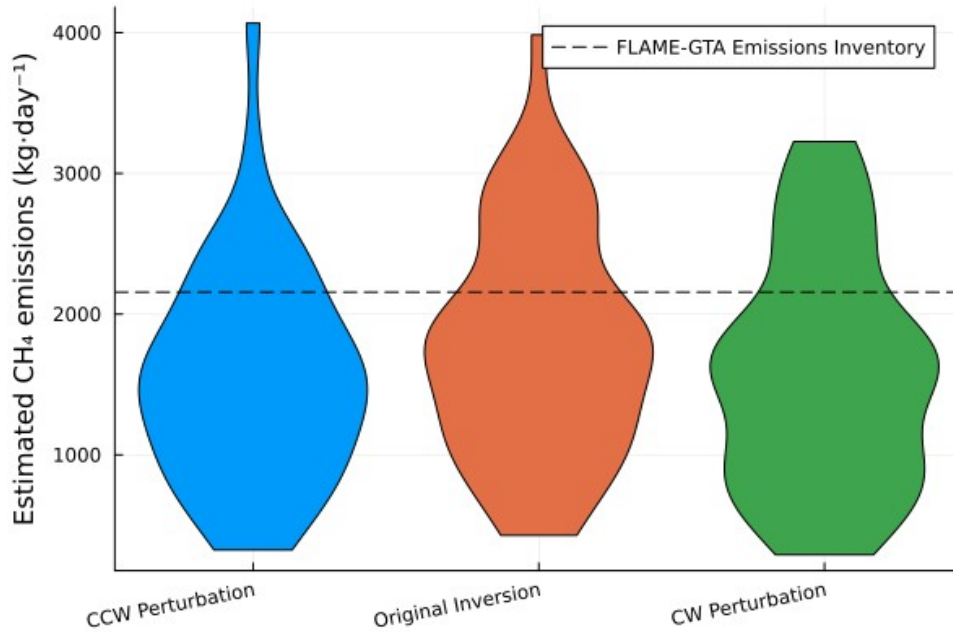

Figure S15: Violin plots showing the relative distribution frequency of emissions rates estimated from inversions with a multiplicative perturbation to the measured wind direction variability as measured by the Airmar WX220s for our ABWWTP inversions. The violin plot of the original inversions is shown in the centre in dark orange.

#### S4.4. ABWWTP Inversion Parameters

Table S3: Transect numbers and inversion parameters for ABWWTP Vehicle Transects

| Date_Transect # | Stability Class | Number of Integration Slices | Posterior Emissions (kg/day) | Posterior Error (kg/day) | Data Filename              |
|-----------------|-----------------|------------------------------|------------------------------|--------------------------|----------------------------|
| 2019-04-25_1    | C               | 2                            | 1349.8765978935              | 161.231479961511         | sync_data_2019-04-25_Truck |
| 2019-04-25_2    | C               | 3                            | 2916.84909577519             | 289.040591885205         | sync_data_2019-04-25_Truck |
| 2019-04-25_3    | B               | 3                            | 1949.8216088839              | 266.677824072728         | sync_data_2019-04-25_Truck |
| 2019-04-25_4    | C               | 2                            | 2174.55177997144             | 440.107044265125         | sync_data_2019-04-25_Truck |
| 2019-09-27_1    | D               | 2                            | 4197.51523057618             | 300.339608749208         | sync_data_2019-09-27_Truck |
| 2019-09-27_2    | D               | 3                            | 1281.79027522266             | 192.682927380736         | sync_data_2019-09-27_Truck |
| 2019-12-12_1    | D               | 2                            | 680.741667875412             | 131.193844110173         | sync_data_2019-12-12_Truck |
| 2019-12-12_2    | D               | 2                            | 874.492768552581             | 201.764877615494         | sync_data_2019-12-12_Truck |
| 2019-12-12_3    | D               | 3                            | 826.978294178305             | 178.588918687398         | sync_data_2019-12-12_Truck |
| 2020-01-30_1    | D               | 3                            | 812.620683234938             | 320.436314262498         | sync_data_2020-01-30_Truck |
| 2020-01-30_2    | D               | 2                            | 685.753404035207             | 165.857306136528         | sync_data_2020-01-30_Truck |
| 2020-03-05_1    | B               | 2                            | 1444.18357390014             | 290.827067500607         | sync_data_2020-03-05_Truck |
| 2020-03-05_2    | B               | 2                            | 2394.89127927294             | 501.856224194356         | sync_data_2020-03-05_Truck |
| 2020-03-05_3    | B               | 2                            | 985.115515438051             | 302.844144717308         | sync_data_2020-03-05_Truck |

Table S4: Transect information and inversion parameters for ABWWTP Bicycle Transects

| Date_Transect # | Stability Class | Number of Integration Slices | Posterior Emissions (kg/day) | Posterior Error (kg/day) | Data Filename        |
|-----------------|-----------------|------------------------------|------------------------------|--------------------------|----------------------|
| 2018-07-13_1    | C               | 3                            | 1155.54084370193             | 233.12280545222          | sync_data_2018-07-13 |
| 2018-07-13_2    | B               | 2                            | 1267.09793850399             | 234.16683291535          | sync_data_2018-07-13 |
| 2018-09-13_1    | B               | 3                            | 1853.57190082979             | 334.280422183308         | sync_data_2018-09-13 |
| 2018-09-13_2    | B               | 3                            | 1907.3310354796              | 363.606396485316         | sync_data_2018-09-13 |
| 2018-09-13_3    | B               | 3                            | 1695.78944612676             | 345.28485734021          | sync_data_2018-09-13 |
| 2019-05-27_1    | D               | 3                            | 410.662694785916             | 115.113390638513         | sync_data_2019-05-27 |
| 2019-05-27_2    | D               | 3                            | 894.569419422288             | 423.826602110733         | sync_data_2019-05-27 |
| 2019-05-27_3    | D               | 2                            | 2073.6                       | 844.660352094261         | sync_data_2019-05-27 |
| 2019-06-07_1    | A               | 2                            | 1640.20733115615             | 314.747607243143         | sync_data_2019-06-07 |
| 2019-06-07_2    | B               | 3                            | 760.688559140317             | 277.402861872351         | sync_data_2019-06-07 |
| 2019-06-19_1    | D               | 2                            | 413.741014207417             | 145.228734867078         | sync_data_2019-06-19 |
| 2019-06-19_2    | C               | 2                            | 548.653528393215             | 202.448707263482         | sync_data_2019-06-19 |
| 2019-06-19_3    | D               | 2                            | 1296.51203985171             | 139.290706048227         | sync_data_2019-06-19 |
| 2019-06-19_4    | C               | 2                            | 1814.82371738185             | 156.324529293532         | sync_data_2019-06-19 |
| 2019-06-19_5    | D               | 2                            | 957.197813463807             | 115.986814916365         | sync_data_2019-06-19 |
| 2019-07-03_1    | A               | 3                            | 2721.74487855647             | 301.387633235863         | sync_data_2019-07-03 |
| 2019-07-03_2    | A               | 3                            | 3151.8839577495              | 322.289645824223         | sync_data_2019-07-03 |
| 2019-07-29_1    | C               | 2                            | 894.259647924485             | 229.345242189047         | sync_data_2019-07-29 |
| 2019-07-29_2    | C               | 2                            | 1047.41486324639             | 234.821084677238         | sync_data_2019-07-29 |
| 2019-07-29_3    | C               | 2                            | 1119.44564931656             | 242.319553604087         | sync_data_2019-07-29 |
| 2019-08-09_1    | B               | 3                            | 2853.37044243056             | 189.271628316093         | sync_data_2019-08-09 |
| 2020-08-31_1    | B               | 3                            | 1378.63229685807             | 233.739727681135         | sync_data_2020-08-31 |
| 2020-08-31_2    | B               | 3                            | 1788.27167431377             | 271.337446708376         | sync_data_2020-08-31 |
| 2020-08-31_3    | B               | 4                            | 1497.47399097418             | 236.867073903044         | sync_data_2020-08-31 |
| 2020-10-14_1    | A               | 5                            | 1686.06041608361             | 296.565630551795         | sync_data_2020-10-14 |
| 2020-10-14_2    | A               | 3                            | 1886.19030647249             | 358.774175265981         | sync_data_2020-10-14 |
| 2020-10-14_3    | A               | 3                            | 2000.86769266902             | 257.743903732469         | sync_data_2020-10-14 |
| 2020-11-20_1    | B               | 3                            | 4001.73514024337             | 303.505781965257         | sync_data_2020-11-20 |
| 2020-11-20_2    | C               | 3                            | 2528.14435125656             | 488.799393571149         | sync_data_2020-11-20 |
| 2021-03-30_1    | B               | 3                            | 2046.4518133174              | 265.140145377635         | sync_data_2021-03-30 |
| 2021-03-30_2    | B               | 3                            | 2745.61501743398             | 255.177015163751         | sync_data_2021-03-30 |
| 2021-05-21_1    | B               | 4                            | 1802.63574686914             | 150.878707609937         | sync_data_2021-05-21 |
| 2021-05-21_2    | B               | 4                            | 1328.91507761172             | 127.512181650766         | sync_data_2021-05-21 |
| 2021-06-01_1    | A               | 4                            | 2647.88241254091             | 355.121858976514         | sync_data_2021-06-01 |
| 2021-06-01_2    | A               | 4                            | 2431.17755238121             | 320.873490173098         | sync_data_2021-06-01 |
| 2021-06-02_1    | B               | 4                            | 3049.16486253711             | 207.514870195597         | sync_data_2021-06-01 |
| 2021-06-02_2    | B               | 3                            | 2961.0128500933              | 208.820270939852         | sync_data_2021-06-01 |
| 2021-06-02_3    | B               | 3                            | 2828.07652257634             | 218.168851065685         | sync_data_2021-06-01 |
| 2021-06-02_4    | B               | 3                            | 1856.35973421698             | 239.703680836213         | sync_data_2021-06-01 |
| 2021-07-06_1    | C               | 3                            | 1320.87630836742             | 98.8462992853891         | sync_data_2021-07-06 |
| 2021-08-04_1    | A               | 3                            | 2036.8624207932              | 271.498948956524         | sync_data_2021-08-04 |
| 2021-08-04_2    | A               | 3                            | 1814.73220963208             | 286.000892445155         | sync_data_2021-08-04 |
| 2021-10-23_1    | D               | 3                            | 778.690842522201             | 77.5548459329506         | sync_data_2021-10-23 |
| 2021-10-23_2    | C               | 3                            | 1066.3286952923              | 166.244940846277         | sync_data_2021-10-23 |

## S5. Instrument Calibration

For our analyzers used in mobile *in situ* surveys, we use the raw dry air mole fractions of methane recorded on each of the GHG analyzers. We conduct irregular calibration experiments using ambient concentration dry air tanks which have been measured by reference CRDS spectrometers, which are regularly calibrated and traceable to the WMO standard scale. Typically, our instruments show a good linear correlation near the ambient concentration range for urban methane observations (1.95-2.2 ppm). No long term drifts have been observed with the LGR UGGA. Between the 2018 and 2019 summer measurement campaigns, the LGR UGGA was returned to the manufacturer for maintenance, and calibration offsets significantly improved from ~80ppb to <15ppb.

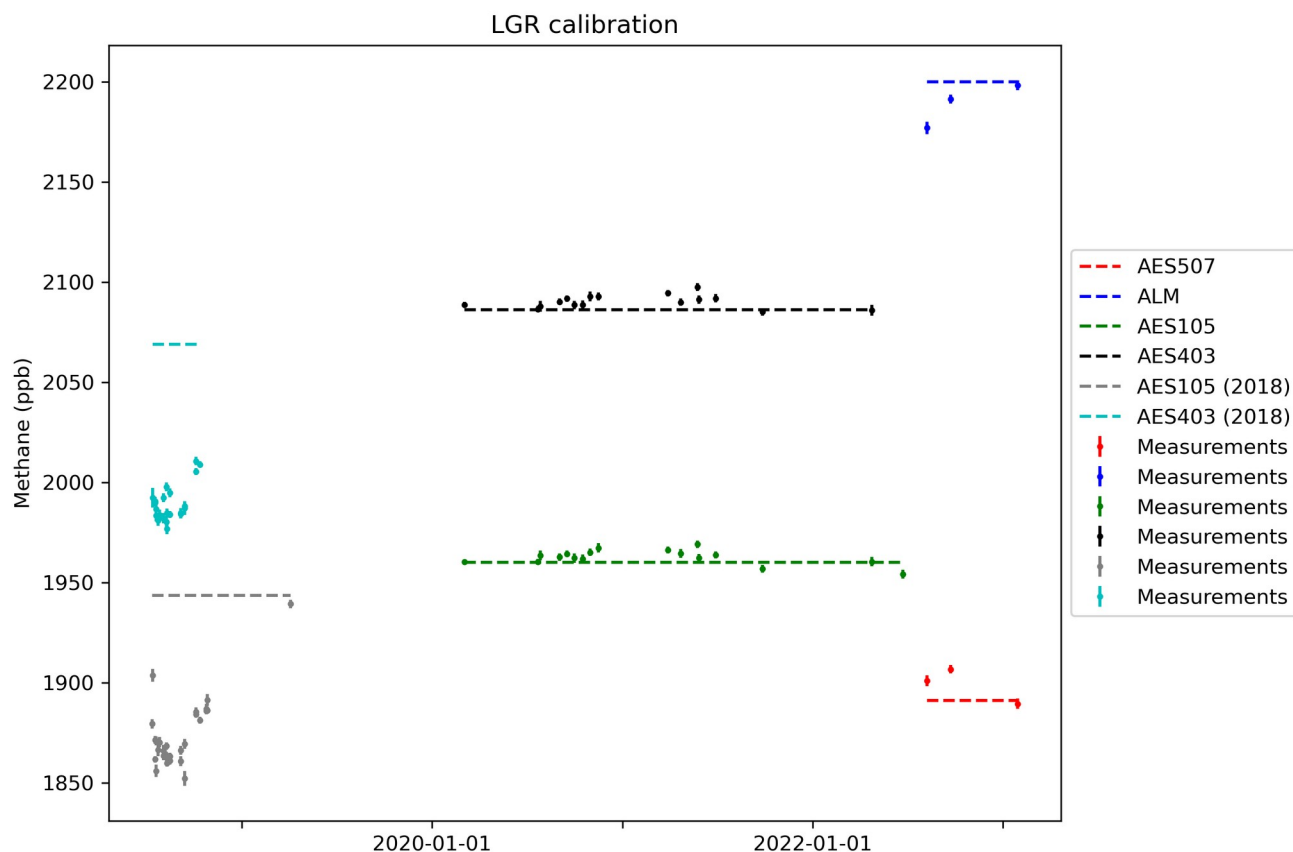

Figure S16: Record of calibration experiments conducted with the LGR UGGA. The improvement in instrument calibration between 2018 and 2019 occurred after the instrument had been returned to the manufacturer for maintenance.



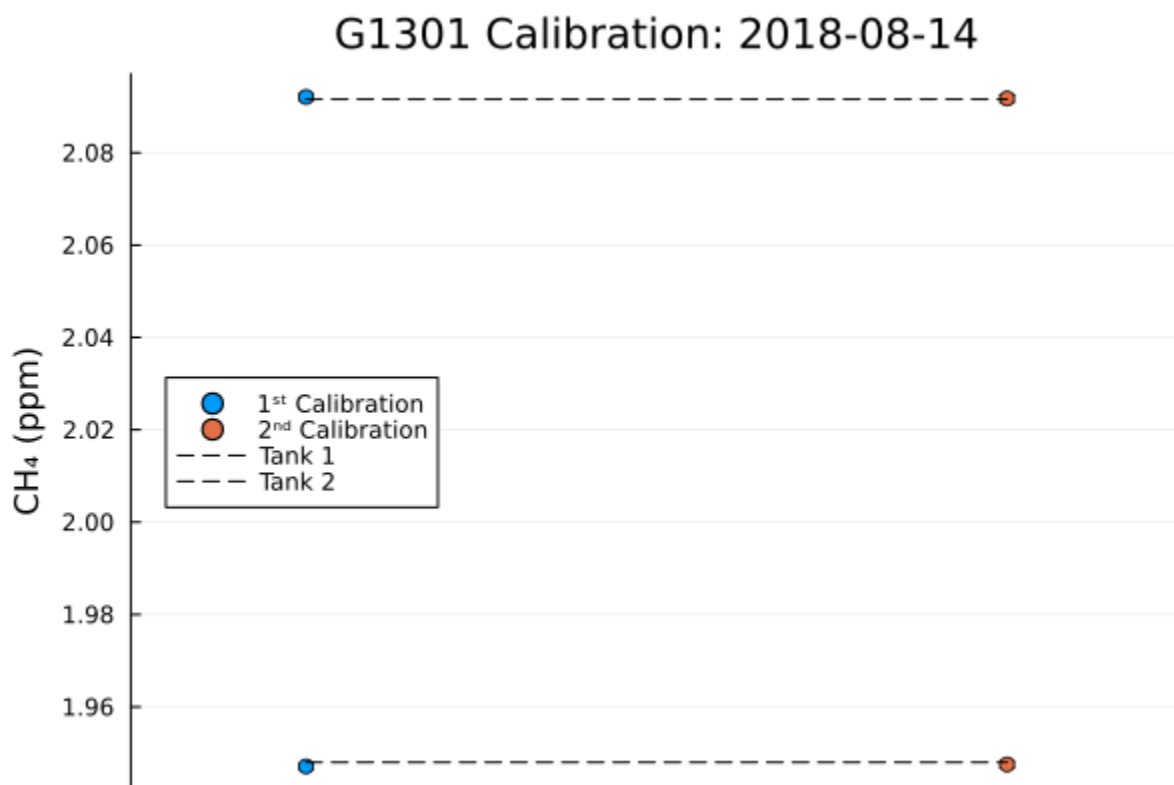

Figure S17: Results from the calibration experiment performed on the Picarro G1301 instrument used for the vehicle based lab surveys from August 2018 to September 2019.

Recently, we have begun to investigate the analyzer’s performance over a span of methane concentration ranges (2-8 ppm). We noticed a potential non-linearity of the LGR UGGA with respect to the concentrations measured by the Picarro G2401 in concentrations greater than 5ppm. We do not account for this potential non-linearity in this paper, as none of the measured methane concentrations in the analyzed plumes are in excess of 3.5 ppm.

### S6. Controlled Release Stability Classes

Gaussian plume stability class represents the largest source of uncertainty for our emissions estimates. For the controlled release experiment, we had stationary in situ meteorology measurements, which allowed us to estimate transect-specific stability classes using the  $\sigma_a$  version of the modified sigma theta method for determining stability classes, as presented in U.S. EPA’s Meteorological Monitoring Guidance for Regulatory Modeling Applications<sup>1</sup>.

| Release Rate (kg/day) | Transect (Bike) | $\sigma_a$ stability class |
|-----------------------|-----------------|----------------------------|
| 2.3                   | 2               | A                          |
| 2.3                   | 3               | B                          |

|      |                |   |
|------|----------------|---|
| 2.3  | 4              | C |
| 4.7  | 1              | B |
| 4.7  | 2              | B |
| 4.7  | 3              | A |
| 9.4  | 2              | B |
| 9.4  | 3              | C |
| 18.9 | 1              | B |
| 18.9 | 2              | B |
| 18.9 | 3              | C |
| 18.9 | 5              | B |
|      | Transect (Car) |   |
| 2.3  | 1              | D |
| 2.3  | 2              | C |
| 2.3  | 3              | A |
| 2.3  | 4              | D |
| 2.3  | 5              | D |
| 2.3  | 6              | C |
| 2.3  | 7              | C |
| 4.7  | 1              | A |
| 4.7  | 2              | B |
| 4.7  | 3              | B |
| 4.7  | 4              | C |
| 9.4  | 1              | B |
| 9.4  | 2              | B |
| 9.4  | 3              | D |
| 18.9 | 1              | D |
| 18.9 | 2              | B |
| 18.9 | 3              | C |
| 18.9 | 4              | B |
| 18.9 | 5              | C |

(1) Bailey, D.; Brode, R.; Bennett, E.; Dicke, J.; Eskridge, R.; Garrison, M.; Irwin, J.; Koerber, M.; Lockhart, T.; Method, T.; Perkins, S.; Wilson, R.; Cannady, B. *Meteorological Monitoring Guidance for Regulatory Modeling Applications*; EPA-454/R-99-005; US EPA: Research Triangle Park, 2000; p 170. [https://www.epa.gov/sites/default/files/2020-10/documents/mmgrma\\_0.pdf](https://www.epa.gov/sites/default/files/2020-10/documents/mmgrma_0.pdf) (accessed 2023-07-27).
